# Supplementary material for: A versatile and low-cost open source pipetting robot for automation of toxicological and ecotoxicological bioassays
Source: PubMed Central journal article supplement (PMC5473567; doi:10.1371/journal.pone.0179636), 2017-06-16
Supplement: pone.0179636.s001.pdf [file pone.0179636.s001.pdf]

## **SUPPLEMENTARY INFORMATION**

### **A versatile and low-cost open source pipetting robot for automation of toxicological and ecotoxicological bioassays**

Sebastian Steffens, Leonie Nüßer, Thomas-Benjamin Seiler, Nadine Ruchter, Mark  
Schumann, Ricarda Döring, Catrina Cofalla, Avi Ostfeld, Elad Salomons, Holger  
Schüttrumpf, Henner Hollert, Markus Brinkmann\*

Total page number: six, including one table  
and four figures.

\*Dr. Markus Brinkmann (corresponding author)

44 Campus Drive

Saskatoon SK, S7N 5B3

Phone: +1 (306) 966 1204

markus.brinkmann@usask.ca

**Table A:** List of components for construction of the Arduino-controlled pipetting robot used throughout the present study.

| <i>Open Beam USA</i>                                  |                                                                                                                                         |
|-------------------------------------------------------|-----------------------------------------------------------------------------------------------------------------------------------------|
| L-bracket                                             | 28 pcs.                                                                                                                                 |
| T-bracket                                             | 19 pcs.                                                                                                                                 |
| NEMA mount adapter                                    | 1 pc.                                                                                                                                   |
| Bracket NEMA 17 stepper motor                         | 2 pcs.                                                                                                                                  |
| Aluminum extrusion profile (30 mm)                    | 4 pcs.                                                                                                                                  |
| Aluminum extrusion profile (60 mm)                    | 8 pcs. with custom M3 thread to attach baseplate to unit; 1 pc. with two custom M4 threads to attach timing belt to the moving platform |
| Aluminum extrusion profile (90 mm)                    | 13 pcs.                                                                                                                                 |
| Aluminum extrusion profile (120 mm)                   | 9 pcs.                                                                                                                                  |
| Aluminum extrusion profile (150 mm)                   | 7 pcs.                                                                                                                                  |
| <i>Adafruit.com</i>                                   |                                                                                                                                         |
| Stepper motor NEMA, 200 steps, 12V, 350 mA            | 1 pc.                                                                                                                                   |
| Spindle drive, 24 V                                   | 1 pc.                                                                                                                                   |
| Linear bearing platform, small                        | 4 pcs.                                                                                                                                  |
| Linear bearing platform, large                        | 4 pcs.                                                                                                                                  |
| Aluminum timing pulley, 6mm belt, 20 tooth, 5 mm bore | 1 pc.                                                                                                                                   |
| Linear rail shaft support, 8 mm diameter              | 8 pcs.                                                                                                                                  |
| Hardened rail shaft, 8 mm diameter, 425mm             | 2 pcs.                                                                                                                                  |
| Hardened rail shaft, 8 mm diameter, 135mm             | 2 pcs.                                                                                                                                  |
| Timing belt, 2 mm pitch, 6 mm width, 1,164 mm length  | 1 pc.                                                                                                                                   |
| <i>Custom-built parts</i>                             |                                                                                                                                         |
| Baseplate                                             | 1 pc. (Figure S1)                                                                                                                       |
| Customized pipette receptacle                         | 1 pc. (Figure S2)                                                                                                                       |
| Moving platform                                       | 1 pc. (Figure S3)                                                                                                                       |
| Sample intake and outflow                             | 1 pc. (Figure S4)                                                                                                                       |

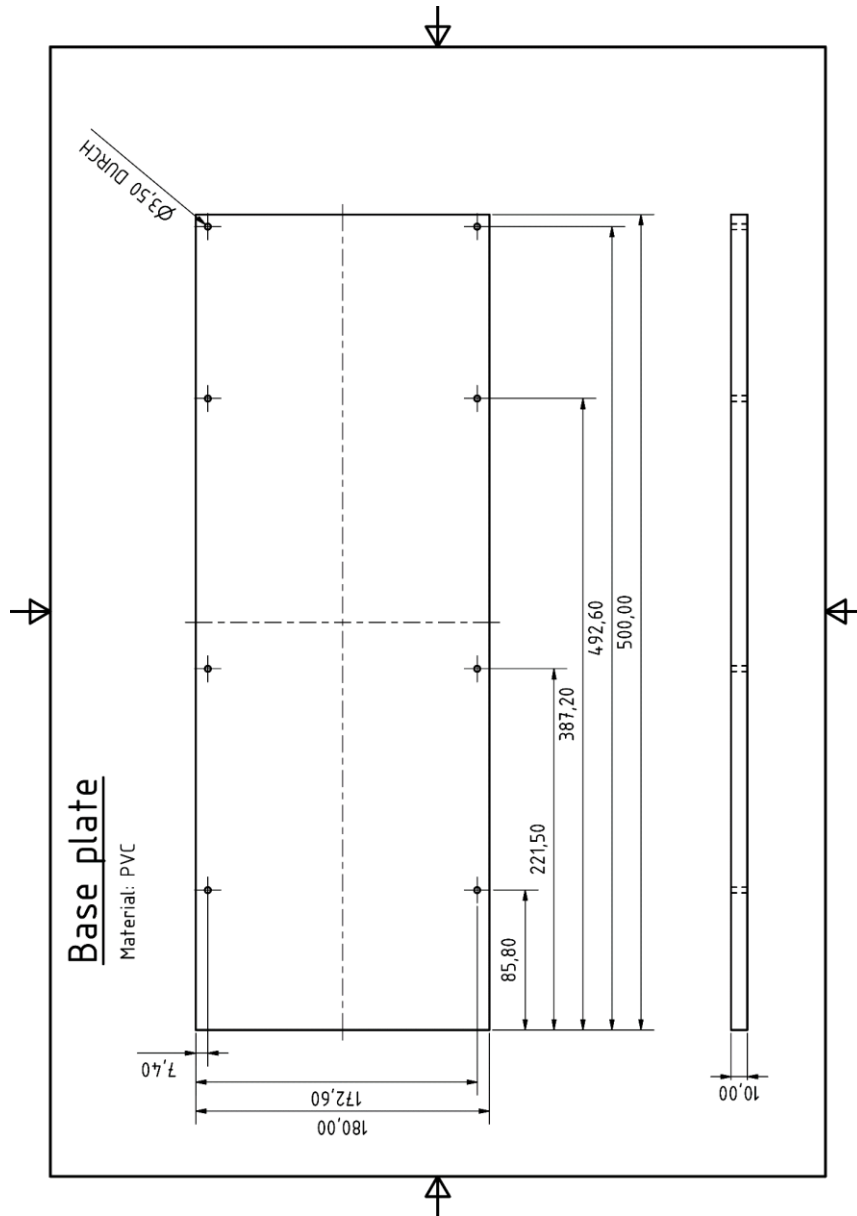

**Fig A: Technical drawing of the baseplate.** The baseplate of the pipetting robot was custom-made from 10 mm PVC sheet material. All dimensions are provided in mm.

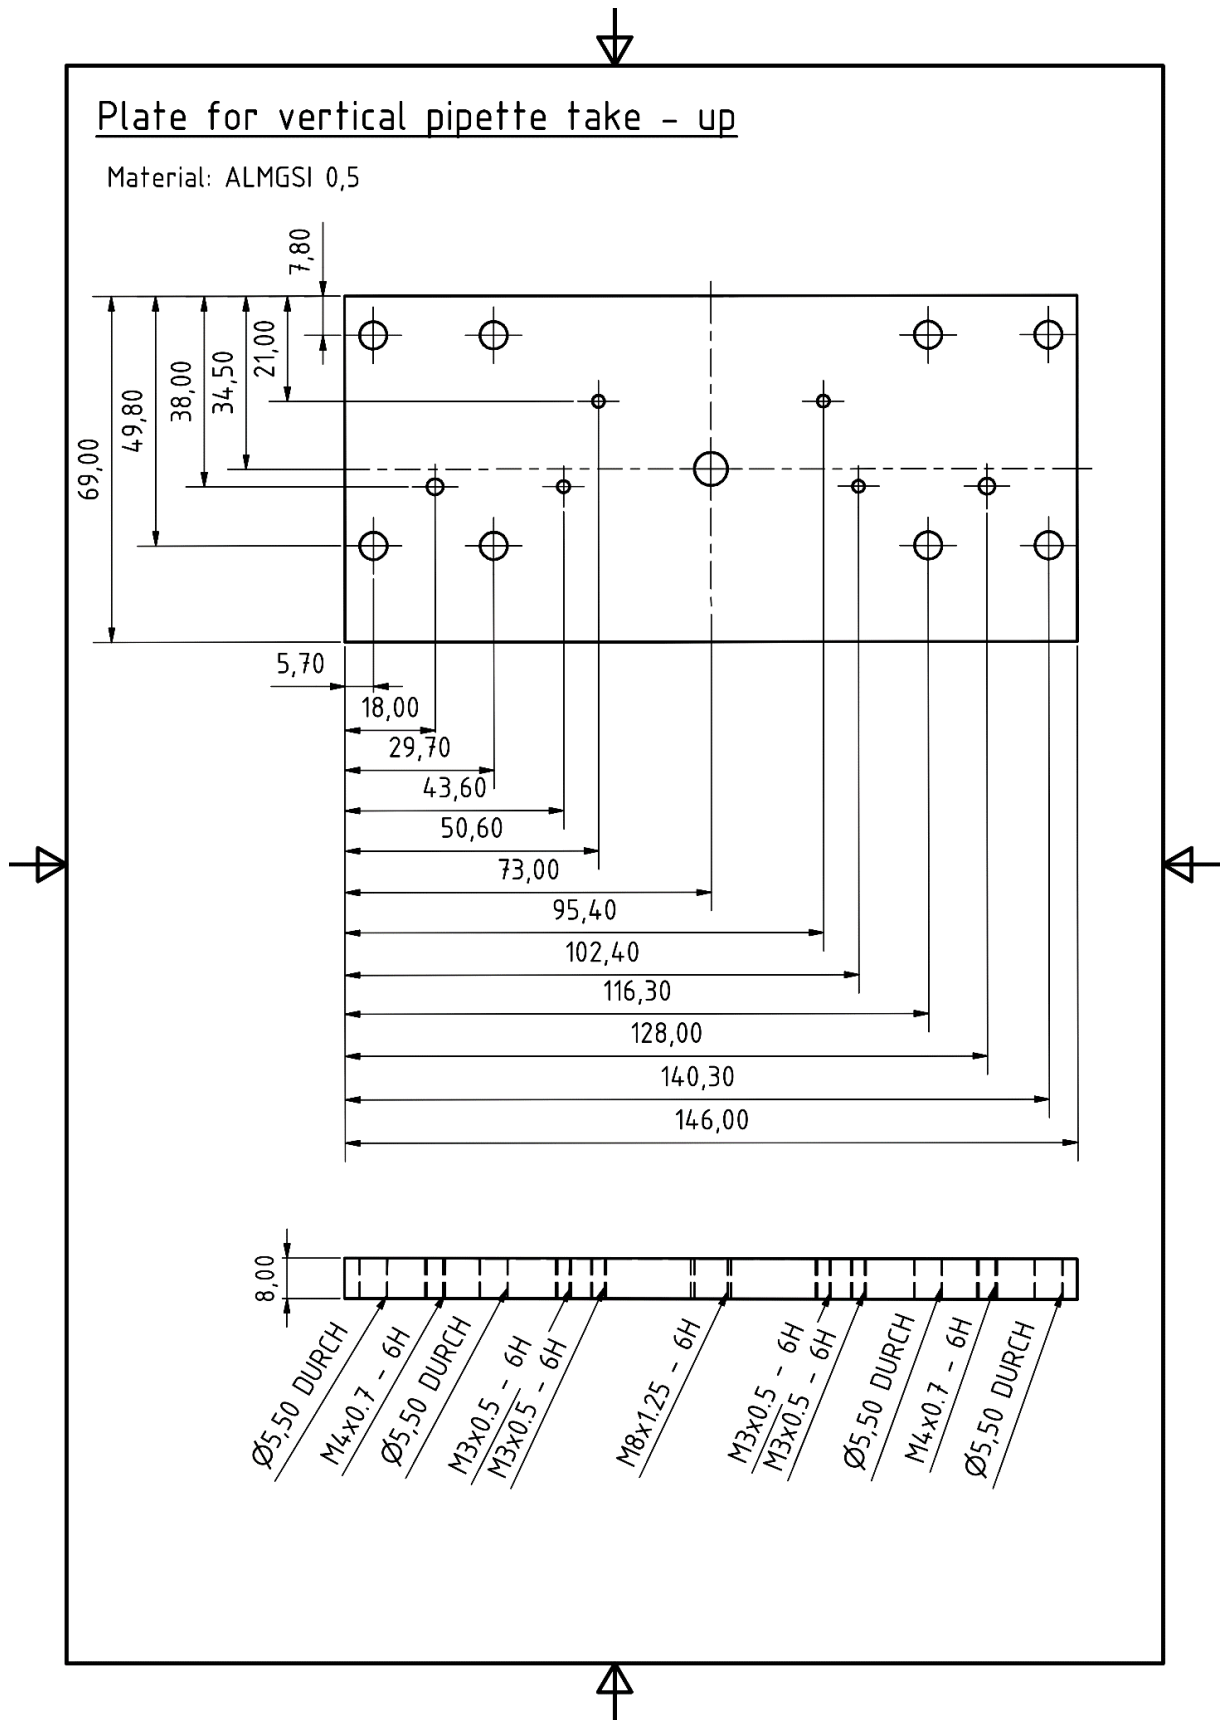

**Fig B: Technical drawing of the pipette receptacle.** The receptacle was custom-made from 8 mm aluminum sheet material. All dimensions are provided in mm.

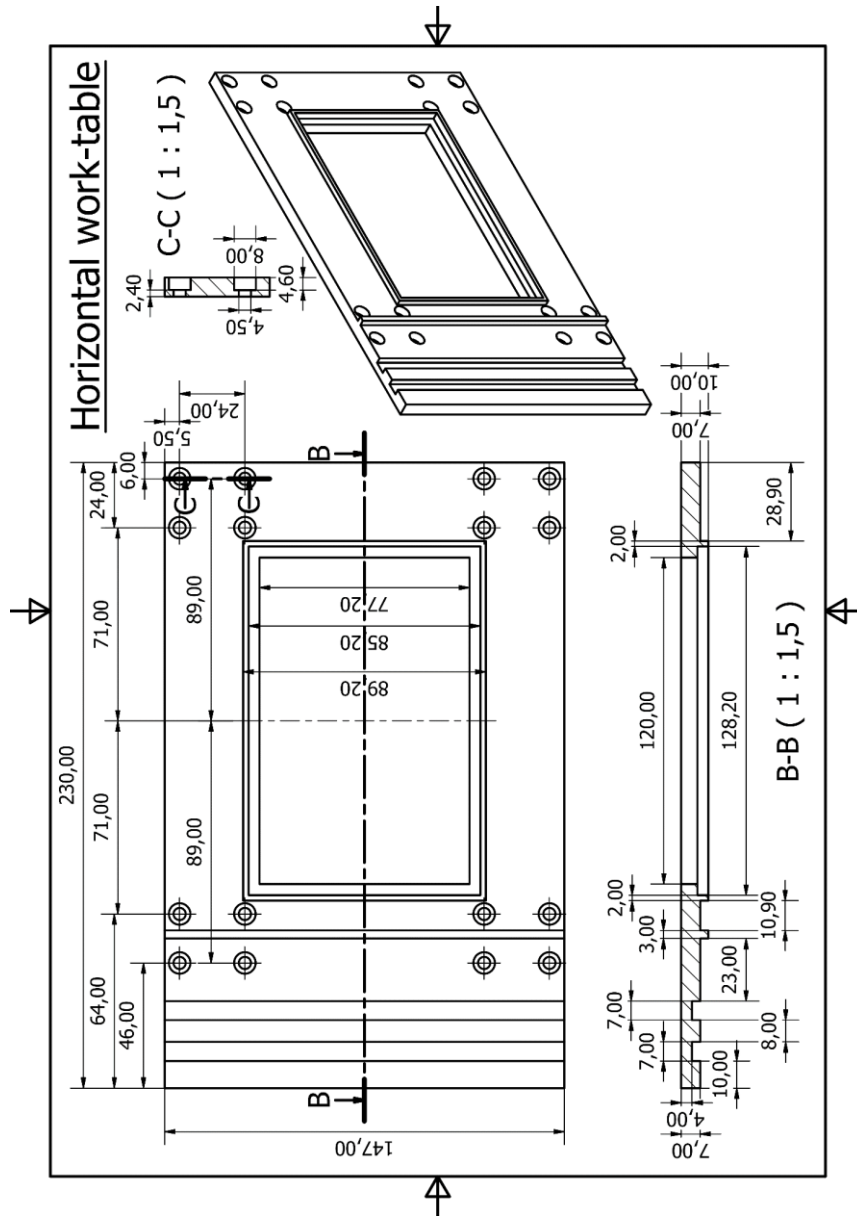

**Fig C: Technical drawing of the moving platform.** The moving platform was custom-made from 11 mm aluminum sheet material. All dimensions are provided in mm.

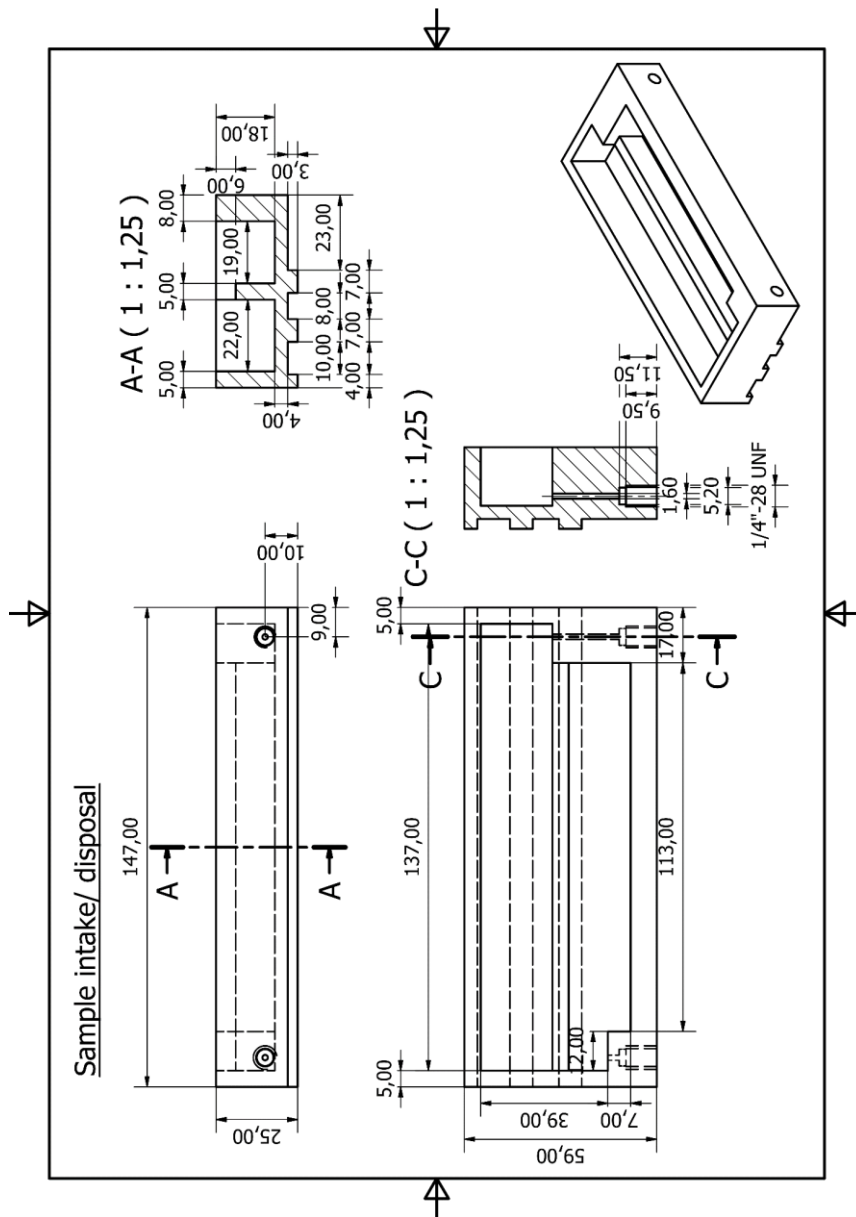

**Fig D: Technical drawing of the sample intake and outflow.** The sample intake and outflow was custom-made from bulk PTFE material. All dimensions are provided in mm.
